1 **Genome-resolved viral ecology in a marine oxygen minimum zone (OMZ)**

2 Dean Vik<sup>1\*</sup>, Maria Consuelo Gazitúa<sup>1,2\*</sup>, Christine L. Sun<sup>1\*</sup>, Montserrat Aldunate<sup>3,4</sup>,  
3 Margaret R. Mulholland<sup>5</sup>, Osvaldo Ulloa<sup>3,4</sup>, Matthew B. Sullivan<sup>1,6,7,#</sup>.

4

5 <sup>1</sup>Department of Microbiology, The Ohio State University.

6 <sup>2</sup>Current affiliation: Viromica Consulting, Santiago, Chile.

7 <sup>3</sup>Department of Oceanography, Universidad de Concepción.

8 <sup>4</sup>Millennium Institute of Oceanography, Universidad de Concepción.

9 <sup>5</sup>Department of Ocean, Earth and Atmospheric Sciences, Old Dominion University.

10 <sup>6</sup>Department of Civil, Environmental and Geodetic Engineering, The Ohio State  
11 University.

12 <sup>7</sup>Center of Microbiome Science, The Ohio State University

13 \*Authors contributed equally.

14 #Corresponding Author: Matthew Sullivan; R914 Riffe Building, 496 W 12th Ave.,  
15 Columbus, OH 43210; [sullivan.948@osu.edu](mailto:sullivan.948@osu.edu)

16

17 **Running Title: Diversity and ecology of novel viruses from an OMZ**

18 Submitted to Environmental Microbiology as a Research Article

19

20 **Originality-Significance Statement:**

21 Marine oxygen minimum zones (OMZs) are unique and important ocean  
22 ecosystems where microbes drive climate-altering nutrient transformations. This study  
23 provides a baseline, deeply sequenced viral metagenomic dataset and reference viral

24 genomes to assess ecological change and drivers across the oxygenated surface to de-  
25 oxygenated deep waters of the Eastern Tropical South Pacific (ETSP) OMZ. Community  
26 ecological assessment of the ETSP viromes reveals a relatively low diversity viral  
27 community with a high degree of endemic populations in the OMZ waters.

28

### 29 **Summary:**

30 Oxygen minimum zones (OMZs) are critical to marine nitrogen cycling and global  
31 climate change. While OMZ microbial communities are relatively well-studied, little is  
32 known about their viruses. Here we assess the viral community ecology of 22 deeply  
33 sequenced viral metagenomes along a gradient of surface oxygenated to anoxic waters  
34 ( $< 0.02 \mu\text{mol/L O}_2$ ) in the Eastern Tropical South Pacific (ETSP) OMZ. We identified  
35 46,127 viral populations ( $>5 \text{ kb}$ ), which augments the known viruses at this site by 10-  
36 fold. ETSP viral communities clustered into 6 groups that correspond to oceanographic  
37 features, with 3 clusters representing samples from suboxic to anoxic waters. Oxygen  
38 concentration was the predominant environmental feature driving viral community  
39 structure. Alpha and beta diversity of viral communities in the anoxic zone were lower  
40 than in surface waters, which parallels the low microbial diversity seen in other studies.  
41 Viruses were largely endemic as few (6% of viruses from this study) were found in at least  
42 another marine metagenome, and of those, most (77%) were restricted to other OMZs.  
43 Together these findings provide an ecological baseline for viral community structure,  
44 drivers and population variability in OMZs that will help future studies assess the role of  
45 viruses in these climate-critical environments.

46

## 47 **Introduction**

48           Oxygen deficient regions of the ocean play a vital role in regulating the ocean  
49 nitrogen budget and greenhouse gas emission (Wright *et al.*, 2012). These low oxygen  
50 regions termed Oxygen Minimum Zones (OMZ) result from a combination of thermal  
51 stratification of the water column, low circulation, temperature- and wind-driven upwelling  
52 currents, and heterotrophic consumption of surface water primary production in deep  
53 water (Wyrski, 1965; Kessler, 2006; Karstensen *et al.*, 2008; Paulmier & Ruiz-Pino, 2009;  
54 Czeschel *et al.*, 2011). Oxygen concentrations in OMZs can reach below the detection  
55 limit of a few nanomoles per liter in certain regions such as the Eastern Tropical South  
56 Pacific (ETSP) (Revsbech *et al.*, 2009; Thamdrup *et al.*, 2012; Ulloa *et al.*, 2012), creating  
57 anoxic marine zones (AMZs). Problematically, OMZs have expanded over the last 50  
58 years as a result of increased ocean stratification from rising surface water temperatures  
59 (Stramma *et al.*, 2008, Wright *et al.*, 2012, Ulloa *et al.*, 2012). As OMZs expand, the  
60 metabolisms found therein – anaerobic ammonium oxidation (anammox) and  
61 denitrification – result in large-scale nitrogen loss through the increased production of N<sub>2</sub>  
62 and the potent greenhouse gas N<sub>2</sub>O (Lam and Kuypers, 2011). Thus, the factors  
63 moderating microbe-mediated nutrient cycling in OMZs require rigorous examination to  
64 better understand the impact of OMZs on climatic trends.

65           The biological factors responsible for the development and maintenance of OMZs  
66 are almost exclusively a result of microbial activity (Zakem *et al.*, 2019). As oxygen is  
67 removed from the environment by heterotrophs, other electron acceptors (such as nitrate  
68 and sulfate) that have progressively lower electron affinities and energy potentials are  
69 used. This results in a gradient of electron acceptors and redox chemistry across the

70 depth gradient, referred to as the redoxcline. Due to the reduction in free energy, the  
71 biogeochemistry of OMZs is almost entirely dictated by the microbial metabolisms  
72 stratified along the redoxcline, rather than macrofaunal respiration (Hawley *et al.*, 2014).  
73 This reduction in energy may be expected to be associated with a reduction in community  
74 size and diversity possibly due to a depletion in niche space (Rabosky, 2009; Beman &  
75 Carolan, 2013). However, major trends in microbial diversity across OMZs remain  
76 unclear, as diversity has been shown to either increase or decrease with the reduction of  
77 oxygen concentration (Stevens & Ulloa, 2008; Bryant *et al.*, 2012). Nevertheless, it is  
78 plausible that diversity trends follow patterns in productivity, *i.e.*, higher relative diversity  
79 in the surface chlorophyll maximum (SCM) and the deep chlorophyll maximum (DCM)  
80 (Chase & Leibold, 2002; Walsh *et al.*, 2016), or the availability of niche space, which  
81 appears to peak at the interface between oxygenated and anoxic water, a transition  
82 environment where a wide array of metabolisms may persist (Bertagnolli & Stewart,  
83 2018).

84         Importantly, viruses have also been shown to play major roles in both bottom-up  
85 and top-down mechanisms controlling microbial communities. In the surface oceans,  
86 viruses mediate microbial population dynamics and metabolism (Suttle, 2007; Hurwitz *et*  
87 *al.*, 2013) through viral lysis, which in addition to protist grazing, results in microbial  
88 mortality rates that are proportional to growth rates at  $\sim 1\text{-}2 \text{ day}^{-1}$  (Ducklow & Hill, 1985;  
89 Cole *et al.*, 1988; Suttle, 1994; Fuhrman & Noble, 1995). The result of this lysis is the  
90 redirection of fixed carbon away from macrofaunal production and into both microbial  
91 respiration and carbon export (Azam *et al.*, 1983; Fuhrman, 1992; Guidi *et al.*, 2016). In  
92 addition, viruses have been shown to encode host-derived auxiliary metabolic genes

93 (AMGs), with a few notable examples of viruses likely associated with sulfur and nitrogen  
94 cycling (Roux *et al.*, 2016; Ahlgren *et al.*, 2019). Though data to date suggest that OMZ  
95 viruses are likely important, a foundational ecological perspective on viruses in these  
96 habitats is lacking.

97 To date, only two genomic studies have explored community dynamics of viruses  
98 in OMZ systems (Cassman *et al.*, 2012; Roux *et al.*, 2014). Both studies were relatively  
99 small in terms of samples collected, sequencing available, and viruses recovered, but  
100 both led to significant advances in our understanding of OMZ viruses. Specifically, Roux  
101 *et al.* (2014) focused on viruses that were recovered from 127 single cell amplified  
102 genomes from uncultivated SUP05 bacteria in a model OMZ ecosystem while Cassman  
103 *et al.* (2012) examined the diversity and size of viral communities in the ETSP OMZ region  
104 through metagenomics. Fortunately, sequencing costs and analytics has improved  
105 considerably since these initial studies, which warrants re-investigation of these viral  
106 communities. Here, we deeply sequence viral metagenomes from 22 seawater samples  
107 to provide 420-fold more sequencing data from these environments to establish genome-  
108 resolved datasets for exploring viral community and population ecology along oxygenated  
109 to anoxic marine waters of the ETSP OMZ.

110

## 111 Results and Discussion

112 Samples were collected from six stations spanning a transect from coastal to  
113 pelagic waters in the ETSP OMZ region off the coast of Lima, Peru (**Figure 1A**, see  
114 Experimental Procedures). The depths at which samples were collected were determined  
115 by distinct oceanographic features (**Figure 1B, Table S1, Figure S1**). At most stations a

116 sample was collected from the surface chlorophyll maximum, the upper oxycline, the  
117 upper OMZ (with or without a secondary deep chlorophyll maximum), and the core of the  
118 OMZ (**Figure 1**). Viral concentrates produced for each sample were sequenced with  
119 Illumina HiSeq 2000 to produce an average of 7.2 Gb bases per sample (**Table S2**). To  
120 provide context with other large studies, the Global Ocean Virome dataset had an  
121 average of 8.9 and 27.2 Gb per sample, on their first and second versions, respectively  
122 (Roux *et al.*, 2016; Gregory *et al.*, 2019). Reads were assembled into scaffolds, from  
123 which viruses were identified and then clustered into viral populations (see Experimental  
124 Procedures) that represent approximately species level viral taxonomy (Brum *et al.*, 2015;  
125 Gregory *et al.*, 2016; Gregory *et al.*, 2019). In total, we recovered 46,127 viral populations  
126 of at least 5 kb in length and used these for all analyses in this study.

127         The relative abundances of the viral populations in each sample were calculated  
128 and normalized across all samples (see Experimental Procedures) and used as input for  
129 biogeographical and diversity analyses (**Table S3**). We hypothesized that viruses would  
130 cluster into distinct communities from the anoxic and oxic waters due to the environmental  
131 differences of these marine habitats (Bertagnolli & Stewart, 2018). This would be similar  
132 to previous studies that have shown OMZs have unique microbial communities,  
133 compared to more oxygenated surface waters (Madrid *et al.*, 2001; Fuchs *et al.*, 2005;  
134 Stevens & Ulloa, 2008; Wright *et al.*, 2012). Overall, 6 main clusters were detected via  
135 hierarchical clustering (**Figure 2**), which is relatively consistent with those predicted from  
136 other statistics including a gap statistic (**Figure S2**) and an affinity propagation analysis  
137 (**Figure S3**). As expected, the anoxic waters of the OMZ were significantly distinct from  
138 the rest of the samples (**Figure 2**). Within the OMZ samples, there were 3 sub-clusters:

139 samples from coastal OMZs (OMC\_C cluster), samples from the upper OMZ with a DCM  
140 (uOMZd cluster), and samples from the remaining upper and core OMZ from pelagic  
141 waters (OMZ\_P cluster) (see Experimental Procedures for cluster name information).  
142 Five of the samples from OMZ\_P cluster also have relatively high concentrations of nitrite  
143 (**Table S1** and **Figure S1F**), and so represent an anoxic marine zone (AMZ) (Thamdrup  
144 *et al.*, 2012; Ulloa *et al.*, 2012). However, for the rest of the OMZ\_P cluster samples, nitrite  
145 measurements are missing (see Experimental Procedures). Other clustering differences  
146 showed that pelagic surface waters differed from the oxycline and coastal surface waters.  
147 The main clusters support the conclusion that viral communities that exist in OMZs are  
148 relatively distinct from those communities found in the ocean surface.

149 We next evaluated our viral communities with various diversity measures, including  
150 evenness, alpha diversity, and beta diversity (**Figure 3A, 3B, 3C**, respectively). The  
151 diversity metrics used were specifically selected to minimize the impact of varying  
152 sequencing depth on diversity estimations. In terms of the entire system, species  
153 accumulation analysis revealed only a 2% increase in species recovery in the last of the  
154 22 randomly permuted sub-samples, indicating sequencing approached saturation  
155 (**Figure S4**). Statistically robust species accumulation analysis was not possible at the  
156 individual community scale due to a lack of samples within a given habitat. Evenness did  
157 not significantly differ between samples from oxygenated regions and the OMZ (**Figure**  
158 **3A**, Kruskal-Wallis p-value = 0.742). The evenness was nearly 1 in all cases (range 0.965-  
159 0.978, mean 0.974), which indicates that no community or sample cluster had a high  
160 relative proportion of dominant viral populations.

161           Alpha diversity, a measure of diversity within a community, was calculated (**Figure**  
162 **3B**) using the inverse Simpson's concentration (see Experimental Procedures), which  
163 facilitates a relatively unbiased comparison of alpha diversity across communities despite  
164 uneven sequencing depth (Haegeman *et al.*, 2013). Alpha diversity did not differ between  
165 communities (Kruskal-Wallis  $p=NS$ ) except for the OMZ\_P cluster, which exhibited a  
166 significantly lower alpha diversity (Kruskal-Wallis  $p = 0.01$ ). Beta diversity, a measure of  
167 the amount of the total diversity accounted for by a given community, was estimated  
168 (**Figure 3C**) via multivariate dispersion, which leverages distance-based ordination  
169 techniques to derive the average distance of all samples in a community from the  
170 community centroid (Anderson *et al.*, 2006). Beta diversity was significantly lower in the  
171 OMZ regions than in the surface waters regarding both population composition (modified  
172 Gower's distance  $\log_{10} p = 0.005$ ) and abundance (modified Gower's distance  $\log_2, p =$   
173  $0.006$ ) (Anderson *et al.*, 2006). The lower alpha and beta diversities for OMZ samples,  
174 consistent with a previous study (Cassman *et al.*, 2012), indicate that niche space is  
175 reduced as energetics of the system decreases along the redoxcline. A similar trend has  
176 also been suggested for microbial community distributions in previous studies (Bryant *et*  
177 *al.*, 2012; Beman & Carolan, 2013; Bertagnolli & Stewart, 2018).

178           Because the hierarchical clustering and diversity measures indicated that OMZ  
179 viral communities were distinct and relatively low in diversity, we next sought to identify  
180 the environmental features driving these patterns. To this end, we created ordination plots  
181 for the samples, as well as for the environmental features data (**Figure 4A, 4B,**  
182 *respectively*; stress plots **Figure S5**). Non-metric multidimensional scaling analysis  
183 (NMDS) with Bray-Curtis dissimilarity revealed that the 6 viral clusters (**Figure 2**) were



184 distinct (**Figure 4A**, stress plots **Figure S5**). These findings were also supported  
185 statistically by ANOSIM (community R stat 0.855,  $p = 0.001$  after 999 permutations) and  
186 by MRPP (distances within groups 0.528, between groups 0.872, overall 0.754, chance  
187 corrected within group agreement 0.351,  $p = 0.001$ ). Together, these findings suggest  
188 ecologically distinct viral communities exist in samples within our dataset.

189         In order to determine whether this separation between clusters could be explained  
190 by the measured environmental features, we compared ordinations based on viral  
191 populations (**Figure 4A**) and environmental features (**Figure 4B**). Similarities among the  
192 structures of these ordination plots and their underlying dissimilarity/distance matrices  
193 would indicate an environmental influence on the distribution of the viral communities.  
194 The structure of the viral community and environmental features ordination plots  
195 (Procrustes sum of squares 0.194, correlation 0.898,  $p = 0.001$ ) (**Figure S6**) and trends  
196 in the dissimilarity/distance matrices (Mantels  $R = 0.675$   $p=0.001$ ) were similar with the  
197 main structural difference being that the OMZ\_P cluster was collapsed in the ordination  
198 created from the environmental features rather than separated into different OMZ sub  
199 groups. These results indicate that environmental features impact viral community  
200 distributions. While paired microbial community data were not available for comparison  
201 here, we posit, as done previously for surface ocean viral communities (Brum *et al.*, 2013,  
202 Brum *et al.*, 2015), that this reflects the environment associated biogeographical  
203 distribution of the resident microbial populations rather than a direct environmental impact  
204 on the viral populations.

205         Temperature and oxygen were the most descriptive gradients implicated in driving  
206 the biogeographical distributions of the viral communities (GAM and Pearson correlation;

207 temperature  $p < 0.0001$ , oxygen  $p < 0.001$ ). The co-variation of these two factors is  
208 expected in our system, as both decrease with depth, from surface to core OMZ waters  
209 (**Table S1**, **Figure S1A**, and **Figure S1B**). We addressed this co-variance by comparing  
210 the structure and agreement between NMDS ordinations of the environmental features  
211 and the viral community distributions again, but with the iterative removal of these  
212 parameters (removal of temperature in **Figure 4C**, removal of oxygen in **Figure 4D**) to  
213 determine which of these features was most important in retaining the similarity between  
214 these ordination analysis. The removal of temperature had an almost negligible impact  
215 on the relationship between the environmental features and the community distributions  
216 (Procrustes sum of squares 0.195, correlation 0.897,  $p = 0.001$ ) indicating a relatively  
217 lower overall impact on the viral community structure. However, removal of oxygen  
218 reduced the relationship considerably (Procrustes sum of squares 0.385, correlation  
219 0.784,  $p = 0.001$ ), suggesting that, not surprisingly, oxygen was the most important driver  
220 of viral community composition (particularly the distinction between the communities  
221 found in the surface oxygenated water and the OMZ). Again, presumably this is due to  
222 the effect of oxygen on microbial populations rather than oxygen directly impacting the  
223 viruses.

224 Previous studies have indicated that OMZs have unique microbial and viral  
225 communities compared to the rest of the ocean (Madrid *et al.*, 2001; Fuchs *et al.*, 2005;  
226 Steven and Ulloa, 2008; Cassman *et al.*, 2012; Wright *et al.*, 2012). In order to determine  
227 to what extent the ETSP viral communities overlap with other oceanic viral communities,  
228 we evaluated whether our ETSP OMZ virus populations were among the ~488K viral  
229 populations available in the Global Ocean Virome version 2.0 dataset (Gregory *et al.*,

230 2019), and if so, assessed their biogeography. Using MMseq2, we identified viral  
231 populations from our study that shared 95% identity (over 50% of the ETSP query protein  
232 coding sequence) with the GOV2.0 populations (see Experimental Procedures). In total  
233 2,763 of our 46,127 ETSP viral populations were also observed in the GOV2.0 dataset  
234 (**Figure 5A**), with about half (1,466) from OMZ samples (**Table S4**). Among these shared  
235 ETSP OMZ viruses, most (77%) were only found in other OMZ samples ( $O_2$  concentration  
236 below 10  $\mu\text{mol/L}$ ) (Helly & Levin, 2004) (**Table S4**). This shows that virtually all of our  
237 ETSP OMZ viral populations are endemic to OMZs, which is consistent with prior work  
238 (Cassman *et al.*, 2012) where viral genotypes were evaluated (rather than viral  
239 populations) and where the geographical context was drastically reduced (only 4,552 viral  
240 genotypes were available for comparison as opposed to the 46,127 assessed here).

241 To further explore how the identified ETSP viral populations compared to known  
242 viruses in the RefSeq database, we used gene sharing networks where viral clusters  
243 (VCs) are approximately genus level taxonomy (Bolduc *et al.*, 2017, Jang *et al.*, 2019).  
244 With the sequences from viral RefSeq (v85) and the 10kb and larger viral populations in  
245 this study, these analyses clustered 10,632 viral populations into 1,465 VCs (**Figure 5B**),  
246 4,020 viral populations into outliers (where populations were assigned to a VC but shared  
247 fewer similar proteins than the bulk of the cluster), and 482 viral populations into  
248 singletons (populations that did not cluster with any other sequences). Only 27 VCs  
249 included known reference viral sequences, which suggests that 98% (1438/1465) of the  
250 VCs derived from the ETSP OMZ dataset likely represent novel viral genera. If true, this  
251 is a 5-fold expansion of viral genus sequence space recovered from our analysis, as  
252 compared to RefSeq. Within the ETSP, 28% of the VCs identified in the OMZ sample

253 were not present in any of the surface or oxycline samples further suggesting that the  
254 OMZ sample is distinct from the oxic habitats

255 Finally, we sought to use read mapping against our expanded dataset of ETSP  
256 viral populations to provide a very gross metric of population stability in these systems as  
257 assessed against the previous shallow viral metagenomic sequencing (Cassman *et al.*  
258 2012). Less than 3% of the reads from Cassman *et al.* recruited to the ETSP viral  
259 populations, which corresponded to either as little as 1 or as much as 698 ETSP viral  
260 populations (using conservative vs permissive coverage cut-offs, see Experimental  
261 Procedures) being present in the prior dataset. This may represent high turnover in viral  
262 populations, but the inference does suffer from ascertainment bias due to the minimal  
263 sequencing available in the prior study.

264

## 265 Conclusions

266 OMZs have been expanding over the last 50 years as a result of rapidly escalating  
267 anthropogenic carbon dioxide emissions increasing atmospheric temperatures, which in  
268 turn has increased ocean temperatures and stratification – features that select for OMZ  
269 formation and expansion (Schmidtke *et al.* 2017). With these ocean changes, and the fact  
270 that the oceans are a major carbon dioxide sink where microbes control that carbon's  
271 fate, it becomes critical to understand how microorganisms will respond to and impact  
272 such changes (Cavicchioli *et al.*, 2019). Viruses that infect these microbes also become  
273 important to understand. In this study, we present the largest survey of viruses from an  
274 OMZ – 46,127 unique viral populations across 6 stations at the ETSP OMZ (**Figure 1**). In  
275 ETSP, OMZ viral communities were distinct and relatively low in diversity compared to

276 oxygenated, surface waters (**Figure 2; Figure 3**), with oxygen as the most important  
277 driver of viral community composition (**Figure 4D**). These viruses are more similar to  
278 viruses from other OMZs and are novel (**Figure 5A, Figure 5B**). This is congruent with  
279 previous studies that have shown OMZs have unique and low diversity microbial  
280 communities, compared to the rest of the ocean (Madrid *et al.*, 2001; Fuchs *et al.*, 2005;  
281 Wright *et al.*, 2012), which may result from the reduced redox potential of the prevalent  
282 electron acceptors in OMZs.

283         Though a large study, limitations are as follows. First, we cannot link the viruses  
284 to their microbial hosts because there is a lack of metagenomic samples from which we  
285 could construct metagenomically assembled genomes (MAGs), and such co-sampled  
286 MAGs improve virus-host linkages typically 5-fold or more (Emerson *et al.*, 2018). Though  
287 AMG are important in the surface oceans (reviewed in Rosenwasser *et al.*, 2016, Hurwitz  
288 & U'Ren, 2016), they were not studied here as they are the focus of a parallel study from  
289 the same dataset that revealed viral genomes that contain AMG associated with the  
290 denitrification, nitrification, and other nitrogen cycle processes, suggesting that these  
291 OMZ viruses influence the nitrogen cycle (Gazitua *et al.*, *submitted*). Future work in OMZs  
292 should be enabled by our current findings and the vast sequence database of reference  
293 virus genomes that will empower a new generation of researchers to evaluate viral roles  
294 in modulating microbial population dynamics and biogeochemical cycling climate-critical  
295 OMZs as they expand due to climate change.

296

297 Acknowledgements.

298 We thank Sullivan Lab members and Heather Maughan for comments on the  
299 manuscript, and the crew of the *R/V Atlantis* for the sampling opportunity and support at  
300 sea. This work was funded in part by awards from NSF Biological Oceanography to MRM  
301 (#1356056), from the Agouron Institute to OU and MBS, a Gordon and Betty Moore  
302 Foundation Investigator Award (#3790) and NSF Biological Oceanography Awards  
303 (#0940390, #1536989) to MBS.

304

## 305 Experimental Procedures

### 306 *Sample collection*

307 On December 31, 2014 – January 22, 2015, six stations spanning a transect from  
308 coastal to pelagic waters in the ETSP OMZ region (off the coast of Peru) were sampled  
309 during the cruise AT-2626 aboard the *R/V Atlantis*. Volumes of 20 liters were collected  
310 using a pump profiling system (PPS), equipped with a Seabird SBE 25 Conductivity  
311 Temperature Depth (CTD), a WET Labs ECO-AFL/FL fluorometer, a Seabird SBE 43  
312 dissolved oxygen sensor and a STOX sensor for nanomolar scale measurements of  
313 oxygen concentrations (detection limit of of 1-10 nmol L<sup>-1</sup> O<sub>2</sub>). Oxygen detection limits  
314 using this sensor was about 0.02 μmol/L. High nitrite concentrations are found in waters  
315 with <50 nM of oxygen (Thamdrup *et al.*, 2012). However, nitrite values in our sampling  
316 were only available for 3 samples (**Table S1**). In the cases where nitrite values were not  
317 obtained for a sample, nitrite values from adjacent depths (±10m) were used if available.

318 Concentrations of dissolved oxygen, nitrite, and other metadata can be found in  
319 **Table S1**. Sampling depths were selected according to variation in oxygen and  
320 chlorophyll concentrations, such as the surface chlorophyll maximum, the suboxic upper

321 oxycline, the anoxic upper OMZ (with or without a deep chlorophyll maximum), and the  
322 core of the OMZ (**Figure 1, Table S1**). Samples for nitrite were filtered using a 0.2  $\mu\text{m}$   
323 cartridge filter. Filtrate was collected into sterile Falcon<sup>TM</sup> tubes and stored upright at -  
324 20°C until analysis. Nitrite concentrations were measured using an Astoria-Pacific  
325 autoanalyzer and standard colorimetric methods (Parsons *et al.*, 1984), with a limit of  
326 detection (LOD) of 0.02  $\mu\text{M}$   $\text{NO}_2^-$ , ( $3\sigma$ ,  $n = 7$ ) (Selden *et al.*, *submitted*).

327       Viral particles of the 22 samples were concentrated from the filtrate by iron chloride  
328 flocculation (John *et al.*, 2011; Duhaime & Sullivan, 2012). Viral concentrates were then  
329 collected on a 1.0 $\mu\text{m}$ , 142mm, polycarbonate (PC) membrane (GE Water and Process  
330 Technologies, Trevose, PA, USA; Cat. #K10CP14220) and stored at 4 °C. The viral-iron  
331 precipitates were resuspended overnight in ascorbic-EDTA buffer (0.1 M EDTA, 0.2 M  
332  $\text{MgCl}_2$ , 0.2 M ascorbic acid, pH 6.0), rotating in the dark at 4°C. DNaseI at 100U  $\text{ml}^{-1}$   
333 concentration was added to the final viral concentrate to remove any free DNA (Hurwitz  
334 *et al.*, 2013). Viral DNA was then extracted using a Wizard DNA purification kit (Promega)  
335 with 1 ml resin to 0.5 ml sample. Samples yielding more than 1 $\mu\text{g}$  DNA (7 out of 22) were  
336 further purified using CsCl buoyant density gradients (Hurwitz *et al.*, 2013). Viral contigs  
337 detected in the CsCl purified samples were retained only if they clustered into populations  
338 with viruses from the non-purified samples and became the representative contig of the  
339 population (the longest contig) (see *Assembly and processing*). Ecological analyses were  
340 then performed using the only 22 DNase-purified samples and representative contigs  
341 from all samples. DNA samples were submitted to JGI for library preparation and Nextera  
342 sequencing on an Illumina HiSeq 2000.

343

344 *Assembly and processing*

345       Data processing and metagenomic analyses were performed using high-memory  
346 computer nodes from the Ohio State Supercomputer Center (Ohio State Supercomputer  
347 Center). Trimmomatic version 0.33 was used to remove Nextera adapters, to split reads  
348 into paired and unpaired groups, and to trim reads with low quality regions below a Phred  
349 score threshold of 15, using a sliding window of 4 bases (Bolger *et al.*, 2014). Reads from  
350 each sample, with or without the CsCl purification step, were then assembled with Spades  
351 version 3.11.1, using the --meta option with paired end reads and the --sc and --careful  
352 options with unpaired reads, both with kmers of 21, 33, and 55 bases (Nurk *et al.*, 2017).  
353 The resulting scaffolds were then clustered into population scale groups at 95% ANI over  
354 80% of the shorter sequence using an in-house wrapper script for nucmer, run with default  
355 settings (Kurtz *et al.*, 2004; Brum *et al.*, 2015).

356

357 *Viral identification*

358       Population contigs larger than 5 kb were processed with the viral identification tools  
359 VirSorter and Virfinder (Roux *et al.*, 2015; Ren *et al.*, 2017), and CAT (Cambuy *et al.*,  
360 2016), based on the steps described in Gregory *et al.* (2019). Populations with VirSorter  
361 categories 1 or 2, or with a VirFinder score  $\geq 0.9$  and a p-value  $< 0.05$  were considered  
362 to be viral, as well those with VirSorter categories 3 to 6 and a VirFinder score  $\geq 0.7$  and  
363 a p-value  $< 0.05$ . Contigs with VirSorter categories 4 and 5 and a VirFinder score  $< 0.7$   
364 were manually curated to check if they were misannotated as prophages. If so, they were  
365 re-assigned to categories 1 or 2, respectively, and considered viral. Contigs with a  
366 VirFinder score between 0.7 and 0.9 (p-value  $< 0.05$ ), without a VirSorter category, were



367 run through CAT and those with < 60% of the genome classified as bacterial, archaeal,  
368 or eukaryotic (based on an average gene size of 1000) were considered viral. **Table S5**  
369 shows the VirSorter, VirFinder, and CAT assignments for each viral population.

370

### 371 *Viral relative abundances*

372 In order to determine the relative abundance of each viral population larger than  
373 5kb, the final viral populations were concatenated and then used as a database to recruit  
374 the quality trimmed reads using a custom wrapper script for bowtie2, which automatically  
375 determines groupings of paired and unpaired reads (Langmead & Salzberg, 2012). The  
376 resulting coverage files were then converted into a relative abundance table with the per  
377 population coverages using a custom wrapper script for BamM  
378 (<https://github.com/ecogenomics/BamM>). Coverages were calculated using the tpmmean  
379 algorithm and adjusted coverages were calculated based on the coverage of each viral  
380 population per Gb of metagenome sequenced. Relative coverages were only reported if  
381 more than 75% of the population had at least 5x coverage, with at least 90% identity over  
382 90% of the read. For reference, **Figure S7** shows the sequencing depth and number of  
383 reads that mapped to viruses for each sample.

384 In order to determine the fraction of the ETSP viral population that was also  
385 identified in the Cassman *et al.* (2012) study, the high quality, trimmed reads from  
386 Cassman *et al.* 2012 were downloaded from MGrast and recruited to the ETSP  
387 populations as described above for the abundance estimates. Due to a low number of  
388 ETSP viral populations being recovered with the stringent coverage threshold above, we

389 eliminated the viral population coverage threshold to allow for more permissive read  
390 recruitment with the reads from Cassman *et al.* (2012).

391

### 392 *Cluster identification*

393 Clusters were inferred using a combination of affinity propagation using the R  
394 function APCluster with options negDistMat(r=2) (Frey & Dueck, 2007; Bodenhofer *et al.*,  
395 2011) and a gap statistic using the R function clusGap with options kmeans, 10, and B =  
396 100, (Tibshirani *et al.*, 2001), resulting in an estimation of between 5 and 8 statistically  
397 supported groups. The relative abundances of the viral populations were then used in  
398 multiple permutations of a hierarchical clustering analysis with minkowski distances (p=2)  
399 to identify an approximation of the viral communities (Suzuki & Shimodaira, 2006).  
400 Viromes clustered with an approximately unbiased bootstrap value of 100% were  
401 considered viral communities. Viral population distributions among the viral communities  
402 were visualized with a heatmap plotted using the R package heatmap3. Bray Curtis  
403 distances were then plotted in a similar fashion to further validate the observed clustering  
404 patterns (Bray & Curtis, 1957).

405 The names of the 6 clusters in **Figure 2** were generated to be as descriptive as  
406 possible, using similar abbreviations from **Figure 1**. The clusters 'OXY\_SCM\_1' and  
407 'OXY\_SCM\_2' denote clusters consisting of samples from oxycline and surface  
408 chlorophyll maximum. The 'SCM' cluster has samples from the surface chlorophyll  
409 maximum only. The 'OMZ\_C' cluster has OMZ samples from the coastal St16, the  
410 'uOMZD' cluster has samples from the upper OMZ with deep chlorophyll maximum, and  
411 the 'OMZ\_P' has samples from the pelagic OMZ core.

412

413 *Comparison with environmental features*

414 Distances within and between viral communities, as defined by the hierarchical  
415 clustering, were evaluated using nonmetric multidimensional scaling with Bray Curtis  
416 distances and 999 permutations or until convergence using the R package *vegan* and the  
417 function *metaMDS* (Field *et al.*, 1982; Oksanen *et al.*, 2018). The statistical significance  
418 of the viral community groups was then validated by comparing the within community and  
419 between community distances with MRPP and ANOSIM (Mielke *et al.*, 1976; Clarke,  
420 1993). Standardized Z-score and raw environmental feature measurements were then  
421 correlated with the viral community ordination using maximum linear and GAM non-linear  
422 algorithms using the R package *envfit* and *odrisurf* respectively (Clarke & Ainsworth,  
423 1993). The environmental features that were used for these correlations are found in  
424 **Table S1**. Note that nitrite values were not used because they were only available from  
425 3 samples directly (other samples had nitrite values taken from adjacent depths).

426 Known co-correlations between significant environmental features were then  
427 addressed by comparing distances between samples according to the relative  
428 abundances of the viral populations and the measured environmental features  
429 (Sunagawa *et al.*, 2015). The standardized and raw environmental features were  
430 represented in ordination space using NMDS and Manhattan distances with 999  
431 permutations until convergence (Field *et al.*, 1982). Relationships between the  
432 standardized or raw environmental features and viral community ordinations were then  
433 evaluated, with and without the removal of a specific environmental feature of interest,  
434 using a Procrustes analysis and Mantel test (Mantel, 1967; Jackson, 1995). Analyses

435 conducted with the standardized and raw environmental features were congruent, but  
436 more easily interpreted with the raw environmental features, and thus, results from the  
437 raw numbers are reported in the main text.

438

#### 439 *Alpha diversity, beta diversity, and evenness*

440 Diversity estimates were based on the relative abundance tables generated via  
441 read recruitment. Evenness, as a measure of the relative similarity among population  
442 abundances within a community, was calculated manually using equation  $H/\ln(S)$  where  
443  $H$  is the Shannon Wiener diversity index per community, calculated with the vegan  
444 diversity application in R using the option `index = "shannon"`, and  $S$  is the observed  
445 species richness of the community, calculated using the vegan application `specnumber`  
446 in R (Shannon, 1948; Pielou, 1966). Simpson concentration indices were calculated per  
447 viral community using the R package `vegan` and the application `diversity` with the option  
448 `index = "invsimpson"` (Simpson, 1949). Alpha diversities were represented as the inverse  
449 simpson concentration in order to facilitate the representation of statistically significant  
450 differences between communities (Jost, 2006) and to mitigate the uncertainties in  
451 diversity estimates due to variations in sampling effort (Haegeman *et al.*, 2013).

452 We then compared beta-diversity among the 6 communities as a measure of the  
453 amount of the total diversity within a system accounted for by a given habitat, using a  
454 multivariate dispersion analysis. This approach facilitates attributing the observed  
455 diversity to only population composition or to population composition and abundance  
456 based on modified Gower distances (Anderson *et al.*, 2006). Raw normalized relative  
457 abundance tables were first log transformed using the R application “`decostand`” and

458 options method = "log" and logbase = 2 or 10. Distances were then calculated using the  
459 vegan application "vegdist" and the options method = "altGower" in R. The multivariate  
460 dispersion analysis was then performed on these distance matrices using the vegan  
461 application "betadisper", "anova", and "permutest" in R with defined groups from the  
462 hierarchical clustering analysis above.

463

#### 464 *Endemism within ETSP*

465       Viral populations were clustered into approximately genus level taxonomic groups  
466 using the network analytic vConTACT2 (Jang *et al.*, 2019) in order to determine the  
467 relative proportion of each viral genus found within a community or shared across ETSP  
468 OMZ communities. Viral ORFs were first predicted and translated from the viral  
469 populations larger than 10 kb using Prodigal version 2.6.3 with the -p meta option (Hyatt  
470 *et al.*, 2010). These predicted ORFs were then used to cluster the 10 kb populations  
471 amongst themselves and with viral Refseq version 85 using vConTACT2 with default  
472 parameters. Specific viral genera in each community were evident from the resulting  
473 network, so the relative abundance of each genus was determined by summing the  
474 relative abundances of the viral populations included in each genus. Genus abundance  
475 data were then tabulated and visualized using the R packages ggplots (Wickham, 2016).

476       Sequence comparisons were then used to determine the amount of ETSP viral  
477 populations larger than 5 kb that were identified in other regions of the ocean. MMseq2  
478 using the easy-search command and with a 95% identity over 50% of the query protein  
479 coding sequence was used to compare the ETSP viruses with the 488k viral populations  
480 identified in the GOV2.0 database (Hauser *et al.*, 2016; Gregory *et al.*, 2019) (**Table S4**).

481 The abundance and distribution of each GOV2.0 population identified was then evaluated  
482 to determine the habitats in which these populations were found. A stacked bar chart was  
483 then created to show the proportional abundance of each ETSP population with  
484 significant similarity to a population in GOV2.0, and the habitat wherein each GOV2.0  
485 population was identified.

486

#### 487 *Data availability*

488 All high-quality reads and assembled contigs are available on iVirus (CyVerse,  
489 <https://doi.org/10.25739/mmj5-kt58>). Requests for further information should be directed  
490 to MBS at [sullivan.948@osu.edu](mailto:sullivan.948@osu.edu).

491

#### 492 References

493 Ahlgren, N. A., Fuchsman, C. A., Rocap, G., & Fuhrman, J. A. (2019) Discovery of several  
494 novel, widespread, and ecologically distinct marine Thaumarchaeota viruses that  
495 encode amoC nitrification genes. *The ISME journal* **13**: 618-631.

496 Anderson, M. J., Ellingsen, K. E., & McArdle, B. H. (2006) Multivariate dispersion as a  
497 measure of beta diversity. *Ecology Letters* **9**: 683-693.

498 Azam, F., Fenchel, T., Field, J. G., Gray, J. S., Meyer-Reil, L. A., & Thingstad, F. (1983)  
499 The Ecological Role of Water-Column Microbes in the Sea. *Marine Ecology*  
500 *Progress Series* **10**: 257-263.

501 Beman, J. M., & Carolan, M. T. (2013) Deoxygenation alters bacterial diversity and  
502 community composition in the ocean's largest oxygen minimum zone. *Nature*  
503 *Communications* **4**:

- 504 Bertagnolli, A. D., & Stewart, F. J. (2018) Microbial niches in marine oxygen minimum  
505 zones. *Nature Reviews Microbiology* **16**: 723-729.
- 506 Bodenhofer, U., Kothmeier, A., & Hochreiter, S. (2011) APCluster: an R package for  
507 affinity propagation clustering. *Bioinformatics* **27**: 2463-2464.
- 508 Bolduc, B., Jang, H.B., Doucier, G., You, Z., Roux, S., Sullivan, M.B. (2017) vConTACT:  
509 an iVirus tool to classify double-stranded DNA viruses that infect Archaea and  
510 Bacteria. *PeerJ* **5**: e3243.
- 511 Bolger, A. M., Lohse, M., & Usadel, B. (2014) Trimmomatic: a flexible trimmer for Illumina  
512 sequence data. *Bioinformatics* **30**: 2114-2120.
- 513 Bray, J. R., & Curtis, J. T. (1957) An Ordination of the Upland Forest Communities of  
514 Southern Wisconsin. *Ecological Monographs* **27**: 325-349.
- 515 Brum, J., Ignacio-Espinoza, J. C., Roux, S., Doucier, G., Acinas, S., Alberti, A. et al.  
516 (2015) Patterns and ecological drivers of ocean viral communities. *Science* **348**:  
517 1261498.
- 518 Brum, J. Schenck, R. & Sullivan, M.B. (2013). Global morphological analysis of marine  
519 viruses shows minimal regional variation and dominance of non-tailed viruses.  
520 *ISME J* **7**:1738–1751.
- 521 Bryant, J. A., Stewart, F. J., Eppley, J. M., & DeLong, E. F. (2012) Microbial community  
522 phylogenetic and trait diversity declines with depth in a marine oxygen minimum  
523 zone. *Ecology* **93**: 1659-1673.
- 524 Cambuy, D.D., Coutinho, F.H. & Dutilh, B.E (2016) Contig annotation tool CAT robustly  
525 classifies assembled metagenomic contigs and long sequences. bioRxiv.  
526 <https://doi.org/10.1101/072868>.

- 527 Cassman, N., Prieto-Davo, A., Walsh, K., Silva, G. G., Angly, F., Akhter, S. et al. (2012)  
528 Oxygen minimum zones harbour novel viral communities with low diversity.  
529 *Environmental Microbiology* **14**: 3043-3065.
- 530 Cavicchioli, R., Ripple, W.J., Timmis, K.N, Azam, F., Bakken, L.R., Baylis, M. et al. (2019)  
531 Scientists' warning to humanity: microorganisms and climate change. *Nat Rev*  
532 *Microbiol* **17**: 569–586.
- 533 Chase, J. M., & Leibold, M. A. (2002) Spatial scale dictates the productivity–biodiversity  
534 relationship. *Nature* **416**: 427-430.
- 535 Clarke, K. R. (1993) Non-parametric multivariate analyses of changes in community  
536 structure. *Austral Ecology* **18**: 117-143.
- 537 Clarke, K. R., & Ainsworth, M. (1993) A method of linking multivariate community structure  
538 to environmental variables. *Marine Ecology Progress Series* **92**: 205-219.
- 539 Cole, J. J., Findlay, S., & Pace, M. L. (1988) Bacterial production in fresh and saltwater  
540 ecosystems: a cross-system overview. *Marine Ecology Progress Series* **43**: 1-10.
- 541 Czeschel, R., Stramma, L., Schwarzkopf, F. U., Giese, B. S., Funk, A., & Karstensen, J.  
542 (2011) Middepth circulation of the eastern tropical South Pacific and its link to the  
543 oxygen minimum zone. *Journal of Geophysical Research* **116**:
- 544 Ducklow, H. W., & Hill, S. M. (1985) The Growth of Heterotrophic Bacteria in the Surface  
545 Waters of Warm Core Rings. *Limnology and Oceanography* **30**: 239-259.
- 546 Duhaime, M. B., & Sullivan, M. B. (2012) Ocean viruses: Rigorously evaluating the  
547 metagenomic sample-to-sequence pipeline. *Virology* **434**: 181-186.



- 548 Emerson, J. B., Roux, S., Brum, J. R., Bolduc, B., Woodcroft, B. J., Jang, H. B. et al.  
549 (2018). Host-linked soil viral ecology along a permafrost thaw gradient. *Nature*  
550 *Microbiology* **3**: 870-880.
- 551 Field, J. G., Clarke, K. R., & Warwick, R. M. (1982) A Practical Strategy for Analysing  
552 Multispecies Distribution Patterns. *Marine Ecology Progress Series* **8**: 37-52.
- 553 Frey, B. J., & Dueck, D. (2007) Clustering by Passing Messages Between Data Points.  
554 *Science* **315**: 972-976.
- 555 Fuchs, B., Woebken, D., Zubkov, M., Burkill, P., & Amann, R. (2005) Molecular  
556 identification of picoplankton populations in contrasting waters of the Arabian Sea.  
557 *Aquatic Microbial Ecology* **39**: 145-157.
- 558 Fuhrman. (1992) *Bacterioplankton roles in cycling of organic matter: the microbial food*  
559 *web*.
- 560 Fuhrman, J. A., & Noble, R. T. (1995) Viruses and Protists Cause Similar Bacterial  
561 Mortality in Coastal Seawater. *Limnology and Oceanography* **40**: 1236-1242.
- 562 Gregory, A. C., Solonenko, S. A., Ignacio-Espinoza, J. C., LaButti, K., Copeland, A.,  
563 Sudek, S. et al. (2016) Genomic differentiation among wild cyanophages despite  
564 widespread horizontal gene transfer. *BMC genomics* **17**: 930.
- 565 Gregory, A. C., Zayed, A. A., Conceição-Neto, N., Temperton, B., Bolduc, B., Alberti, A.  
566 et al. (2019) Marine DNA Viral Macro- and Microdiversity from Pole to Pole. *Cell*  
567 **177**: 110-1123.e14.
- 568 Guidi, L., Chaffron, S., Bittner, L., Eveillard, D., Larhlimi, A., Roux, S. et al. (2016)  
569 Plankton networks driving carbon export in the oligotrophic ocean. *Nature* **532**:  
570 465-470.

- 571 Haegeman, B., Hamelin, J., Moriarty, J., Neal, P., Dushoff, J., & Weitz, J. S. (2013)  
572 Robust estimation of microbial diversity in theory and in practice. *The ISME journal*  
573 **7**: 1092-1101.
- 574 Hauser, M., Steinegger, M., & Söding, J. (2016) MMseqs software suite for fast and deep  
575 clustering and searching of large protein sequence sets. *Bioinformatics (Oxford,*  
576 *England)* **32**: 1323-1330.
- 577 Hawley, A. K., M. Brewer, H., Norbeck, A. D., Paša-Tolić, L., & Hallam, S. J. (2014)  
578 Metaproteomics reveals differential modes of metabolic coupling among  
579 ubiquitous oxygen minimum zone microbes. *Proceedings of the National Academy*  
580 *of Sciences of the United States of America* **111**: 11395-11400.
- 581 Helly, J. J., & Levin, L. A. (2004) Global distribution of naturally occurring marine hypoxia  
582 on continental margins. *Deep-Sea Research Part I* **51**: 1159-1168.
- 583 Hurwitz, B. L., Hallam, S. J., & Sullivan, M. B. (2013) Metabolic reprogramming by viruses  
584 in the sunlit and dark ocean. *Genome Biology* **14**: R123.
- 585 Hurwitz, B. L. & U'ren, J. M. (2016) Viral metabolic reprogramming in marine ecosystems.  
586 *Current Opinion in Microbiology* **31**: 161-168.
- 587 Hyatt, D., Chen, G., Locascio, P. F., Land, M. L., Larimer, F. W., & Hauser, L. J. (2010)  
588 Prodigal: prokaryotic gene recognition and translation initiation site identification.  
589 *BMC bioinformatics* **11**: 119.
- 590 Jackson, D. A. (1995) PROTEST: A PROcrustean Randomization TEST of community  
591 environment concordance. *Écoscience* **2**: 297-303.

- 592 Oksanen, J., Blanchet, F. G., Friendly, M., Kindt, R., Legendre, P., McGlinn, D. et al.  
593 (2018). *vegan: Community Ecology Package*. R package version 2.5-2.  
594 <https://CRAN.R-project.org/package=vegan>
- 595 Jang, H., Bolduc, B., Zablocki, O., Kuhn, J. H., Roux, S., Adriaenssens, E. M. et al. (2019)  
596 Taxonomic assignment of uncultivated prokaryotic virus genomes is enabled by  
597 gene-sharing networks. *Nature biotechnology* **37**: 632-639.
- 598 John, S. G., Mendez, C. B., Deng, L., Poulos, B., Kauffman, A. K. M., Kern, S. et al. (2011)  
599 A simple and efficient method for concentration of ocean viruses by chemical  
600 flocculation. *Environmental microbiology reports* **3**: 195-202.
- 601 Jost, L. (2006) Entropy and diversity. *Oikos* **113**: 363-375.
- 602 Karstensen, J., Stramma, L., & Visbeck, M. (2008) Oxygen minimum zones in the eastern  
603 tropical Atlantic and Pacific oceans. *Progress in oceanography* **77**: 331-350.
- 604 Kessler, W. S. (2006) The circulation of the eastern tropical Pacific: A review. *Progress*  
605 *in Oceanography* **69**: 181-217.
- 606 Kurtz, S., Phillippy, A., Delcher, A. L., Smoot, M., Shumway, M., Antonescu, C., &  
607 Salzberg, S. L. (2004) Versatile and open software for comparing large genomes.  
608 *Genome biology* **5**: R12.
- 609 Lam, P. and Kuypers, M. M.M. (2011) Microbial Nitrogen Cycling Processes in Oxygen  
610 Minimum Zones. *Annual Review of Marine Science* **3**:317-345.
- 611 Langmead, B., & Salzberg, S. L. (2012) Fast gapped-read alignment with Bowtie 2.  
612 *Nature Methods* **9**: 357-359.

- 613 Madrid, V. M., Taylor, G. T., Scranton, M. I., & Chistoserdov, A. Y. (2001) Phylogenetic  
614 Diversity of Bacterial and Archaeal Communities in the Anoxic Zone of the Cariaco  
615 Basin. *Applied and Environmental Microbiology* **67**: 1663-1674.
- 616 Mantel, N. (1967) The Detection Approach.
- 617 Mielke, P. W., Berry, K. J., & Johnson, E. S. (1976) Multi-response permutation  
618 procedures for a priori classifications. *Communications in Statistics - Theory and*  
619 *Methods* **5**: 1409-1424.
- 620 Nurk, S., Meleshko, D., Korobeynikov, A., & Pevzner, P. A. (2017) metaSPAdes: a new  
621 versatile metagenomic assembler. *Genome research* **27**: 824-834.
- 622 Ohio Supercomputer Center. Ohio Supercomputer Center. Columbus OH: Ohio  
623 Supercomputer Center 1987.
- 624 Parsons, T.R., Maita, Y., and Lalli, C.M. (1984) A manual of biological and chemical  
625 methods for seawater analysis. Oxford: Pergamon Press.
- 626 Paulmier, A., & Ruiz-Pino, D. (2009) Oxygen minimum zones (OMZs) in the modern  
627 ocean. *Progress in Oceanography* **80**: 113-128.
- 628 Pielou, E. C. (1966) The measurement of diversity in different types of biological  
629 collections. *Journal of Theoretical Biology* **13**: 131-144.
- 630 Rabosky, D. L. (2009) Ecological limits and diversification rate: alternative paradigms to  
631 explain the variation in species richness among clades and regions. *Ecology*  
632 *Letters* **12**: 735-743.
- 633 Ren, J., Ahlgren, N. A., Lu, Y. Y., Fuhrman, J. A., & Sun, F. (2017) VirFinder: a novel k-  
634 mer based tool for identifying viral sequences from assembled metagenomic data.  
635 *Microbiome* **5**: 69.

- 636 Resvbech, N. P., Larsen, L. H., Gundersen, J., Dalsgaard, T., Ulloa, O., & Thamdrup, B.  
637 (2009) Determination of ultra-low oxygen concentrations in oxygen minimum  
638 zones by the STOX sensor. *Limnology and Oceanography Methods* **7**(5):371-381.
- 639 Rosenwasser, S., Carmit, Z., Graff van Creveld, S., & Vardi, A. (2016) Virocell  
640 Metabolism: Metabolic Innovations During Host–Virus Interactions in the Ocean.  
641 *Trends in Microbiology* **24**: 821-832.
- 642 Roux, S., Brum, J. R., Dutilh, B. E., Sunagawa, S., Duhaime, M. B., Loy, A. et al. (2016)  
643 Ecogenomics and potential biogeochemical impacts of globally abundant ocean  
644 viruses. *Nature* **537**: 689-693.
- 645 Roux, S., Enault, F., Hurwitz, B. L., & Sullivan, M. B. (2015) VirSorter: mining viral signal  
646 from microbial genomic data. *PeerJ* **3**: e985.
- 647 Roux, S., Hawley, A. K., Torres Beltran, M., Scofield, M., Schwientek, P., Stepanauskas,  
648 R. et al. (2014) Ecology and evolution of viruses infecting uncultivated SUP05  
649 bacteria as revealed by single-cell- and meta-genomics. *eLife* **3**: e03125.
- 650 Schmidtko, S., Stramma, L. & Visbeck, M. (2017) Decline in global oceanic oxygen  
651 content during the past five decades. *Nature* **542**: 335–339.
- 652 Selden, C. R., Mulholland, M. R., Widner, B., Bernhardt, P. W., Chang, B., and A.  
653 Jayakumar. N<sub>2</sub> fixation in the Eastern Tropical South Pacific oxygen deficient zone:  
654 Implications for the range of marine diazotrophs. *Frontiers in Microbiology* (in  
655 review).
- 656 Shannon, C. E. (1948) A Mathematical Theory of Communication. **27**: 3790423.
- 657 Simpson, E. (1949) Measurement of diversity. *Nature* **163**: 688.

- 658 Stevens, H., & Ulloa, O. (2008) Bacterial diversity in the oxygen minimum zone of the  
659 eastern tropical South Pacific. *Environmental Microbiology* **10**: 1244-1259.
- 660 Stramma, L., Johnson, G. C., Sprintall, J., & Mohrholz, V. (2008) Expanding Oxygen-  
661 Minimum Zones in the Tropical Oceans. *Science* **320**: 655-658.
- 662 Sunagawa, S., Coelho, L. P., Chaffron, S., Kultima, J. R., Labadie, K., Salazar, G. *et al.*  
663 (2015) Structure and function of the global ocean microbiome. *Science* **348**:  
664 1261359.
- 665 Suttle, C. A. (1994) The Significance of Viruses to Mortality in Aquatic Microbial  
666 Communities. *Microbial Ecology* **28**: 237-243.
- 667 Suttle, C. A. (2007) Marine viruses - major players in the global ecosystem. *Nature*  
668 *Reviews Microbiology* **5**: 801-812.
- 669 Suzuki, R., & Shimodaira, H. (2006) Pvclust: an R package for assessing the uncertainty  
670 in hierarchical clustering. *Bioinformatics* **22**: 1540-1542.
- 671 Thamdrup, B., Dalsgaard, T., & Revsbech, N.P. (2012) Widespread functional anoxia in  
672 the oxygen minimum zone of the Eastern South Pacific. *Deep Sea Research Part*  
673 *1: Oceanographic Research Papers* **65**:36-45.
- 674 Tibshirani, R., Walther, G., & Hastie, T. (2001) Estimating the number of clusters in a data  
675 set via the gap statistic. *Journal of the Royal Statistical Society* **63**: 411-423.
- 676 Ulloa, O., Canfield, D. E., DeLong, E.F., Letelier, R. M., & Steward, F. J. (2012) Microbial  
677 oceanography of anoxic oxygen minimum zones. *Proceedings of the National*  
678 *Academy of Sciences of the USA* **109**(40): 15996-16003.

679 Walsh, E. A., Kirkpatrick, J. B., Rutherford, S. D., Smith, D. C., Sogin, M., & D'Hondt, S.  
680 (2016) Bacterial diversity and community composition from seafloor to  
681 subseafloor. *The ISME journal* **10**: 979-989.

682 Wickham, H. *ggplot2: Elegant Graphics for Data Analysis*. Springer-Verlag New York,  
683 2016.

684 Wright, J. J., Konwar, K. M., & Hallam, S. J. (2012) Microbial ecology of expanding oxygen  
685 minimum zones. *Nature Reviews Microbiology* **10**: 381-394.

686 Wyrski, K. (1965) Surface Currents of the Eastern Tropical Pacific Ocean. *Inter-American*  
687 *Tropic Tuna Commission IX*:

688 Zakem, E.J., Mahadevan, A., Lauderdale, J.M., & Follows, M. J. (2019) Stable aerobic  
689 and anaerobic coexistence in anoxic marine zones. *The ISME Journal* **14**: 288-  
690 301.

691

692 Table and Figure Legends

693 **Figure 1. Map of the study area and vertical characterization of the sampling**  
694 **stations. A.** Location of stations 7, 8, 14, 16, 17, and 18, off the coast of Peru in the ETSP  
695 OMZ. The map was created with Ocean Data View (<http://odv.awi.de>). **B.** Oxygen (solid  
696 blue line) and fluorescence/chlorophyll (solid green line) depth profiles from each station.  
697 Samples were collected at depths indicated by lines with the colored circles to depict the  
698 sample type: surface chlorophyll maximum in yellow, oxycline in orange, upper OMZ with  
699 deep chlorophyll maximum (DCM) in green and without DCM in light blue, and OMZ core  
700 in dark blue.

701

702 **Figure 2. Hierarchical clustering of samples based on normalized relative**  
703 **abundances of viral populations revealed 6 clusters.** Each row represents a different  
704 sample, labelled by station and sample type (scm = surface chlorophyll maximum, oxy =  
705 oxycline, uomzD = upper OMZ with deep chlorophyll maximum, uomz = upper OMZ  
706 without DCM, and omz = omz core). Each column represents a different viral population  
707 ( $\geq 5$ kb), where the normalized relative abundance values ( $\log_{10}$  transformed) are shown  
708 in grayscale. RPKM means Reads Per Kilobase, per Million mapped reads.  
709 “Approximately unbiased” bootstrapping values are represented as a proportion of 100  
710 permutations.

711  
712 **Figure 3. Diversity measures for the 6 main viral community clusters. A.** Evenness  
713 across the 6 clusters. **B.** Alpha Diversity. **C.** Beta Diversity, where red corresponds to the  
714 beta diversity differences resulting from abundance while blue represents the beta  
715 diversity differences related to composition. The top and bottom of each box show the  
716 standard deviation while the line inside the box shows the mean. Points within each box  
717 represent the number of samples per community.

718  
719 **Figure 4. Environmental influence on the distribution of viral communities. A.** Viral  
720 community ordination using NMDS and Bray-Curtis dissimilarities. Each of the 6 distinct  
721 communities are incorporated into the outlined clusters and color coded. **B.**  
722 Environmental feature ordination using NMDS and Euclidean distance. The colors are the  
723 same as in A. **C.** A comparison between the viral community ordination and environmental  
724 feature ordination where temperature has been removed from the latter dataset. Each



725 arrow represents a sample's spatial distance between ordinations, again with the same  
726 color coding. The statistical similarity between ordinations is represented as the  
727 Procrustes sum of squares where a lower value is more significant. D. The same  
728 comparison between the viral community ordination and environmental feature  
729 ordination, but with oxygen removed from the latter dataset.

730

731 **Figure 5. Sequence similarity to GOV2.0. A.** ETSP sequence matches to GOV2.0  
732 sequences, separated and color coded by GOV2.0 sample type. Each bar along the x-  
733 axis represents an ETSP community and each color along the y-axis represents the  
734 percent of relative abundance per GOV2.0 hit. Relative proportions within each  
735 community were calculated by summing relative abundances of each population within a  
736 GOV2.0 hit location, and then dividing that sum by the total sum of relative abundances  
737 with GOV2.0 hits (see Experimental Procedures). **B.** Distribution of viral clusters (viral  
738 genera) across each of the 6 communities. Each bar along the x-axis represents one viral  
739 cluster, colored by the percent of VC found in given community.

740

741 **Table S1. Metadata for the 22 samples collected and sequenced.** Location and  
742 measurements of the selected environmental features sampled per site and depth.  
743 Samples are organized and labeled according to their respective cluster from the  
744 hierarchical clustering of the viral population abundances.

745

746 **Table S2. Sequencing information for each sample.** For each of the samples used in  
747 this study, this table lists the number of raw read, number of reads following quality

748 control, the number of viral populations identified in each sample, and the number of reads  
749 that map to viral populations.

750

751 **Table S3. Relative abundances of the viral populations in each sample.** The  
752 abundances were normalized across samples via number of viral sequencing reads and  
753 by the length of each sequence.

754

755 **Table S4. Comparison of viruses from ETSP and GOV2.** Statistics for the ETSP viral  
756 populations with significant protein coding sequence similarity with GOV2.0, according to  
757 MMseq2 “easy-search”. Only sequences sharing 95% identity across 50% of the  
758 sequence are reported.

759

760 **Table S5. Categorization of viral populations.** For each of the 46,127 viral populations,  
761 this table contains the VirSorter, VirFinder, and CAT assignments.

762

763 **Figure S1. Vertical distribution of oxygen, temperature and salinity of the 6 sampled**  
764 **stations.** Oxygen, temperature and salinity depth profiles of the first 300 meters of each  
765 station. Colored circles indicate the depths where each of the 22 samples were collected:  
766 surface chlorophyll maximum in yellow (“scm”), oxycline in orange (“oxy”), upper OMZ  
767 with deep chlorophyll maximum (DCM) in green (“uomzD”) and without DCM in light blue  
768 (“uomz”), and OMZ core in dark blue (“omz”).

769

770 **Figure S2. Gap statistic for the number of significant sample clusters.** The cluster  
771 size, in number of samples, is where the observed within cluster distance is the smallest  
772 and yields the highest “gap” between expected within group distances. This was  
773 calculated using a null model, and observed within group distances. Here, clusters were  
774 derived by kmeans with 100 bootstraps and a maximize cluster size of 10.

775  
776 **Figure S3. Affinity propagation analysis.** Clustering of samples according to negative  
777 squared Euclidean distances, using default input and exemplar preferences. The lighter  
778 yellow color corresponds with a higher similarity score, and each cluster is represented  
779 in the dendrograms with color coded bars.

780  
781 **Figure S4. Species accumulation curve.** The number of species (viral populations)  
782 identified by 100 random sub-samplings of each of the pooled 22 samples across  
783 sampling depth and stations. Species richness estimations were computed using the  
784 jackknife2 estimator.

785  
786 **Figure S5. NMDS stress plots of viral communities and environmental features.** A  
787 comparison of the fit of the distances displayed in the NMDS ordination plot with the true  
788 Bray Curtis dissimilarities between each station.

789  
790 **Figure S6. Ordination plot of environmental features. Procrustes comparison of the**  
791 **environmental features and viral populations.** An alignment of the NMDS ordination  
792 plot created for the viral populations (Bray-Curtis dissimilarity) and environmental features

793 (Euclidean distance). No environmental features were removed from this comparison.

794 Procrustes sum of squares is 0.194.

795

796 **Figure S7. Sequencing depth.** Plot comparing the sequencing depth (gray bars), in

797 terms of the number of post-quality control paired end reads, to the number of reads from

798 that recruited to the identified viral populations, pooled from all samples (black bars).

799

A

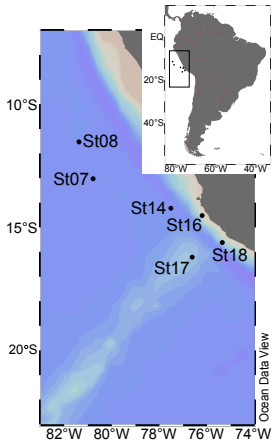

B

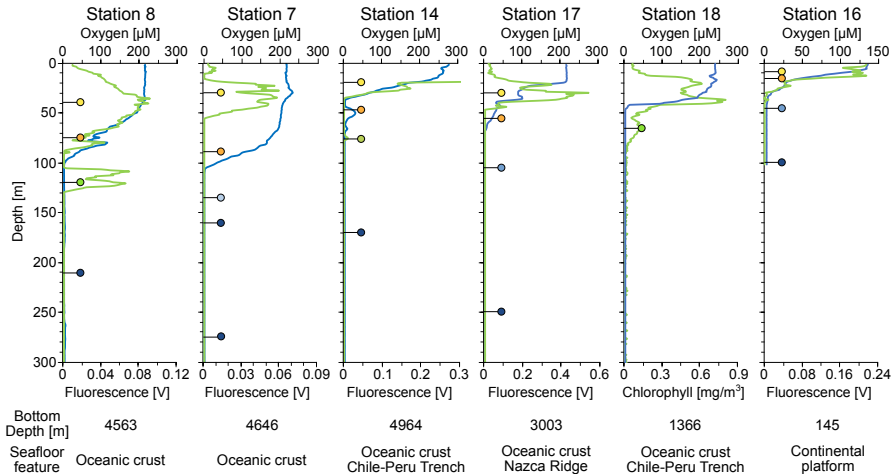

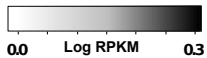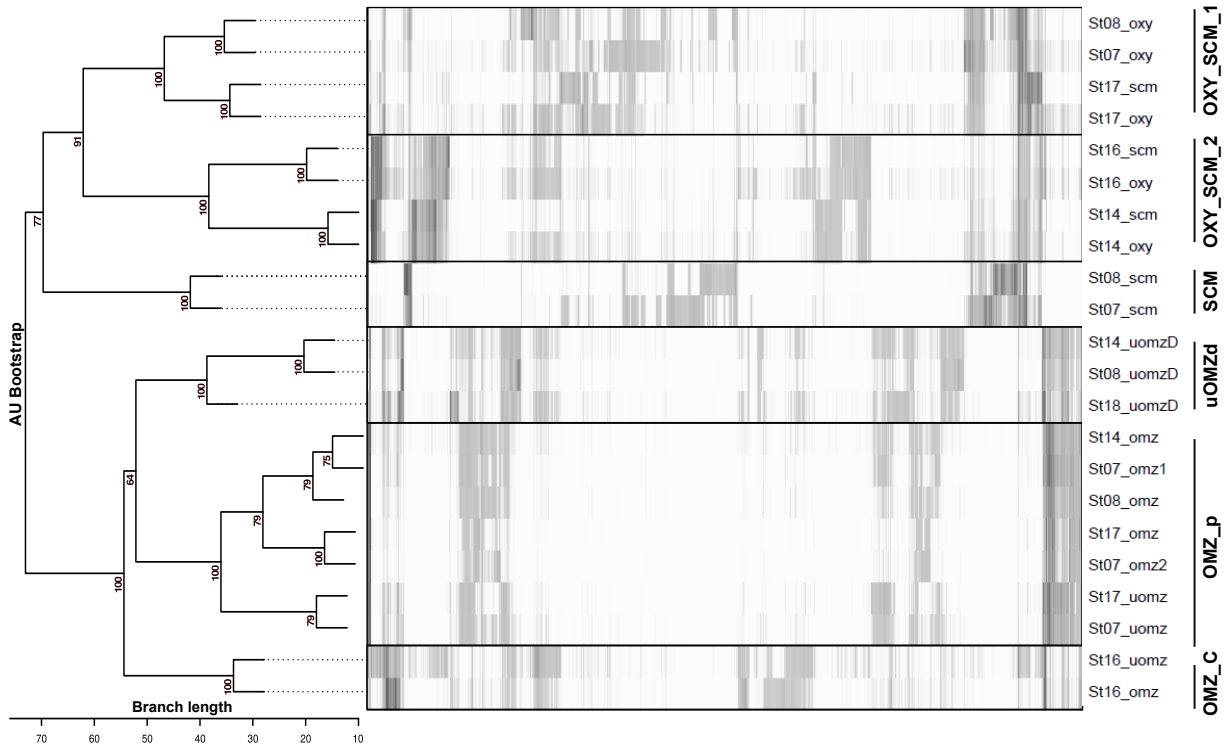

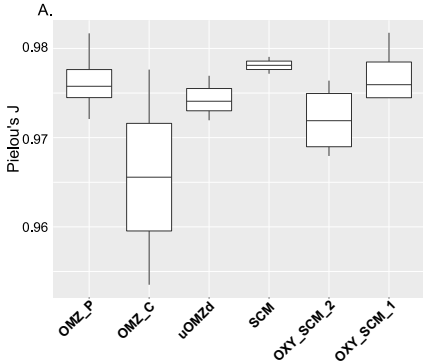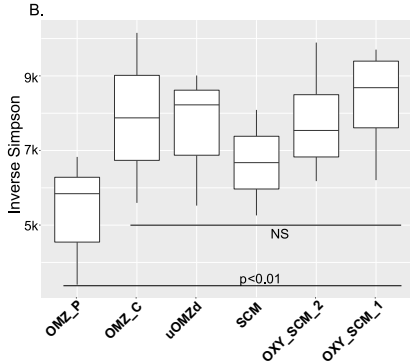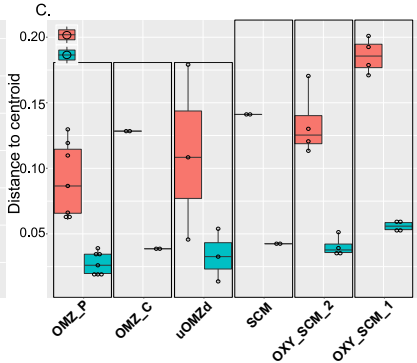

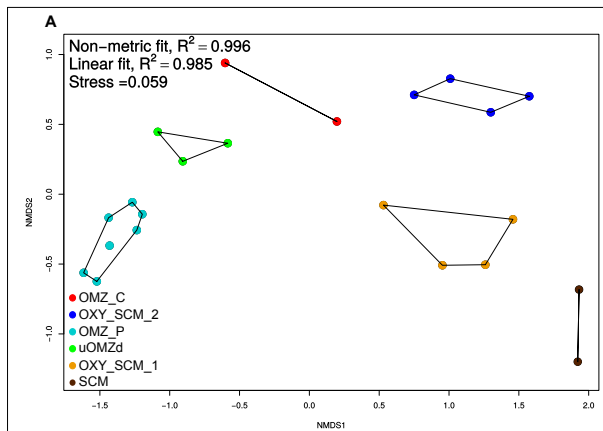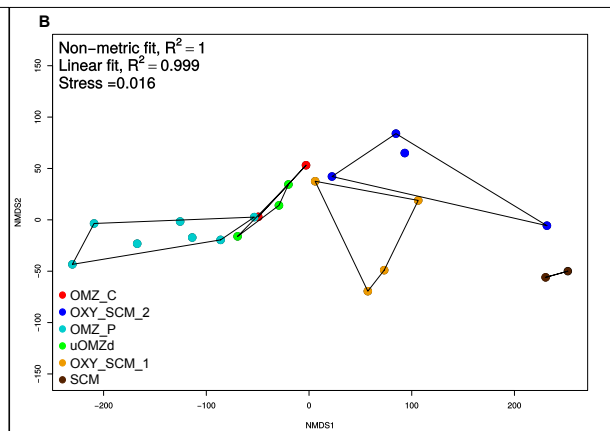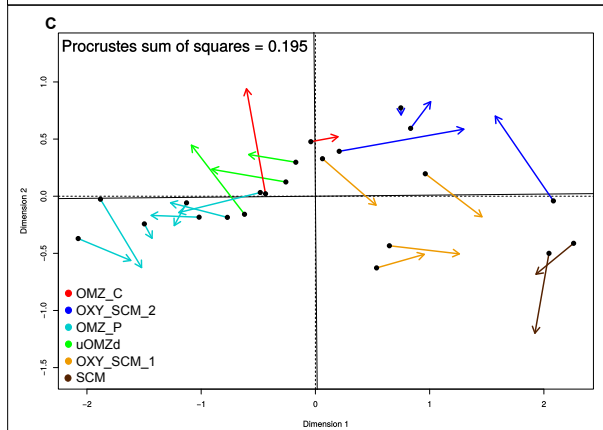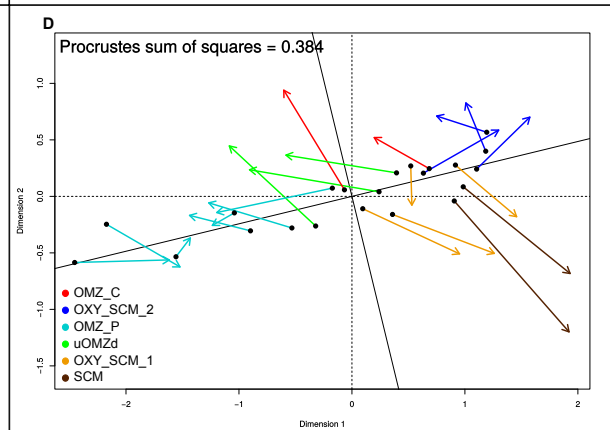



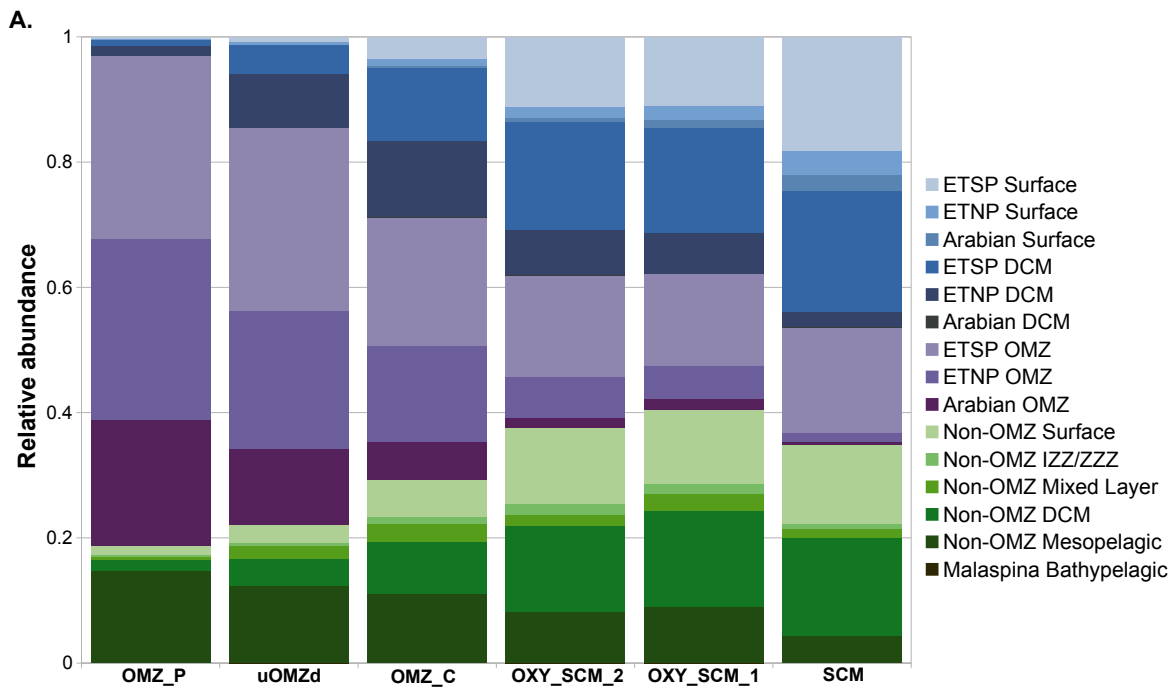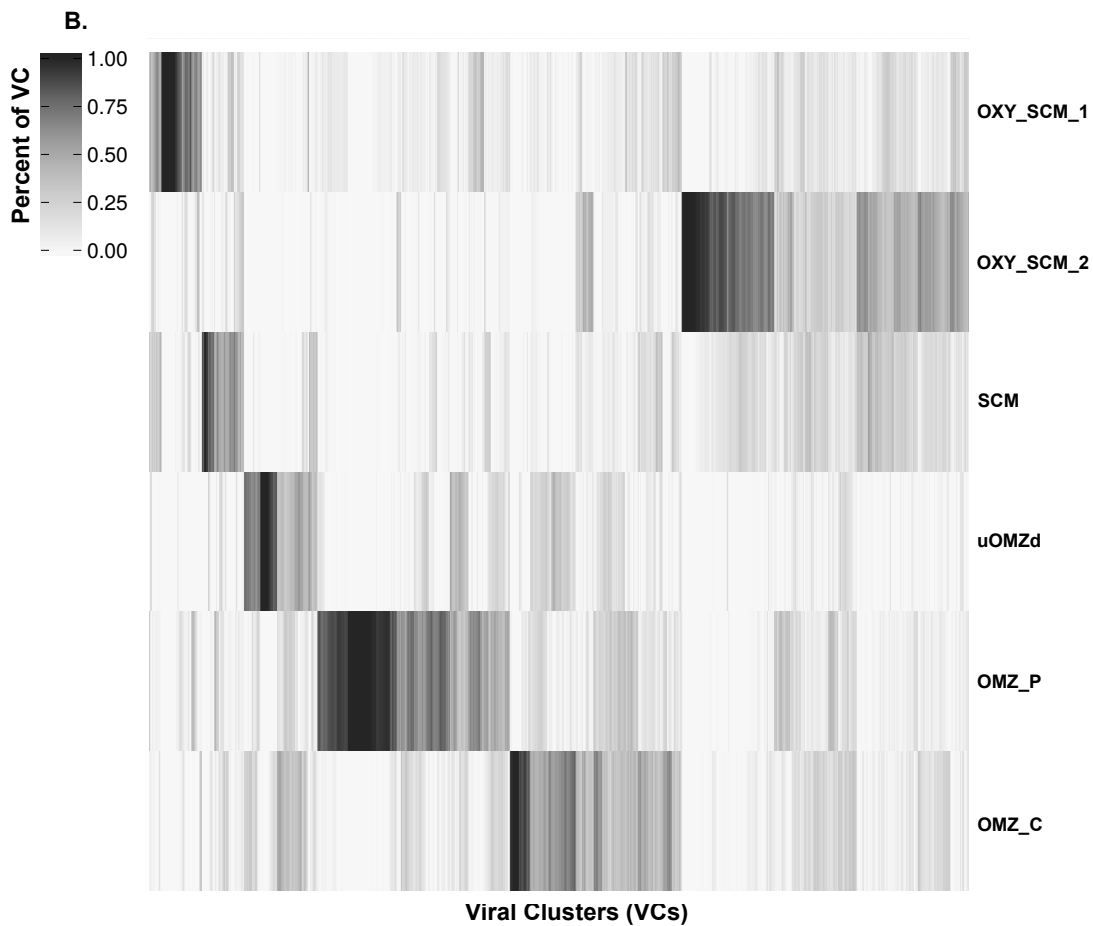

Source: https://www.biorxiv.org/content/10.1101/2020.07.22.215772v1.full.pdf
